# Supplementary material for: Gene Polymorphism and Total Genetic Score in Martial Arts Athletes with Different Athletic Qualifications
Source: MDPI journal article supplement (doi:10.3390/genes13091677), 2022-09-19
Supplement: s1 [file s1]

## Supplementary Material

### Gene polymorphism and total genetic score in martial arts athletes with different athletic qualifications

Anna Vostrikova <sup>1</sup>, Victoria Pechenkina <sup>1</sup>, Maria Danilova <sup>1</sup>, Svetlana Boronnikova <sup>1\*</sup>, Ruslan Kalendar <sup>2,3\*</sup>

<sup>1</sup> Faculty of Biology, Perm State National Research University, 614990, Perm, Russia;

<sup>2</sup> National Laboratory Astana, Nazarbayev University, Nur-Sultan 010000, Kazakhstan;

<sup>3</sup> Institute of Biotechnology HiLIFE, University of Helsinki, 00029 Helsinki, Finland;

\* Authors to whom correspondence should be addressed: [svboronnikova@yandex.ru](mailto:svboronnikova@yandex.ru) (SB); [ruslan.kalendar@helsinki.fi](mailto:ruslan.kalendar@helsinki.fi) (RK); Tel.: +358294158869 (RK)

AV: [vostanyuta@mail.ru](mailto:vostanyuta@mail.ru)

ORCID 0000-0002-9330-2918

VP: [p\\_viktoria2@mail.ru](mailto:p_viktoria2@mail.ru)

ORCID 0000-0003-4241-4482

MD: [ruadry@list.ru](mailto:ruadry@list.ru)

ORCID 0000-0002-1916-9709

SB: [svboronnikova@yandex.ru](mailto:svboronnikova@yandex.ru)

ORCID 0000-0002-5498-8160

RK: [ruslan.kalendar@helsinki.fi](mailto:ruslan.kalendar@helsinki.fi)

ORCID 0000-0003-3986-2460

**Fragments of the electrophoregram of PPARGC1A, NOS3, BDKRB2, ACE gene  
amplification products**

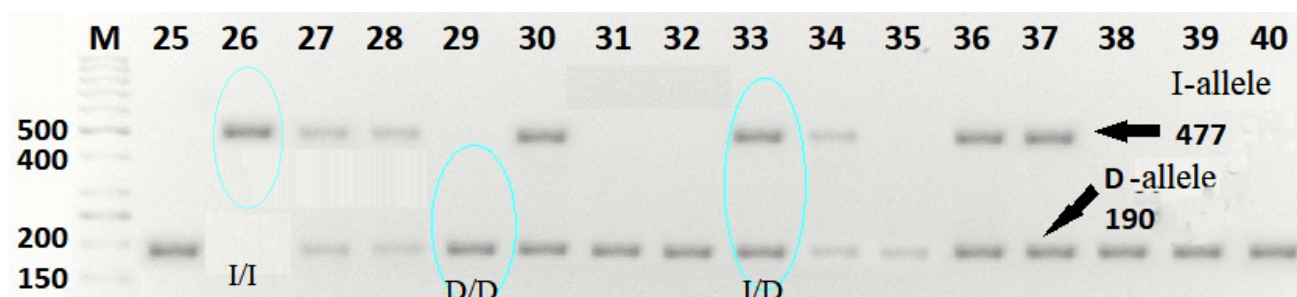

**Figure S1.** A fragment of the electrophoregram of the products of amplification of polymorphic alleles of the *ACE* gene in martial artists; I/I, I/D, D/D - genotypes of the *ACE* gene; the numbers at the top indicate the serial numbers of the samples; M - molecular weight marker (100 bp + 1.5 + 3 Kb DNA Ladder); arrows indicate alleles; represented part of the spectrum.

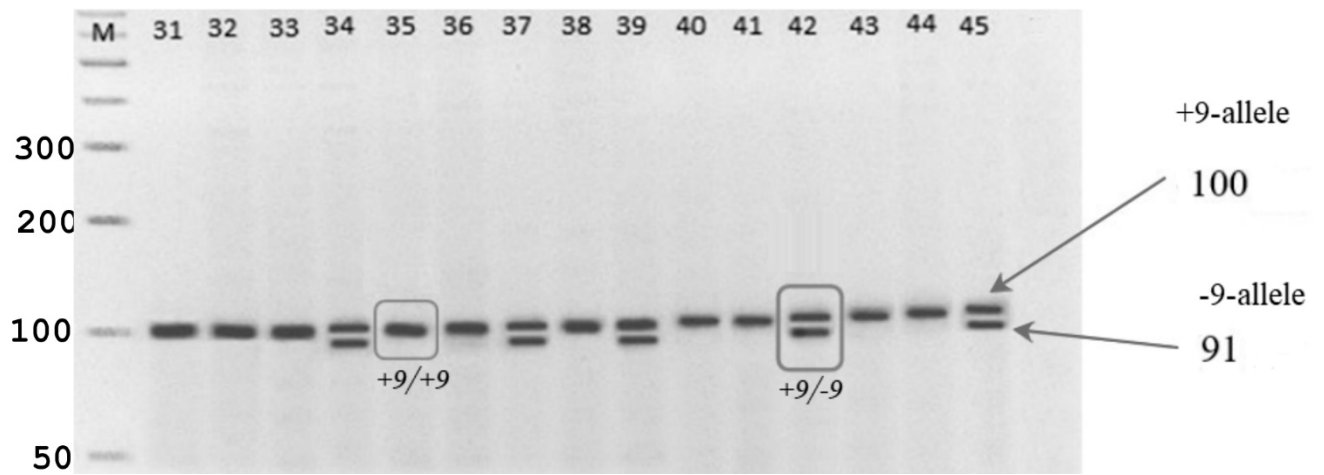

**Figure S2.** A fragment of the electrophoregram of the products of amplification of polymorphic alleles of the *BDKRB2* gene in martial artists; +9/+9, -9/+9, *BDKRB2* gene genotypes; the numbers at the top indicate the serial numbers of the samples; Size marker: 50 bp, 100 bp DNA Ladder, marked on the left in bp (50 bp to 500 bp); arrows indicate alleles.

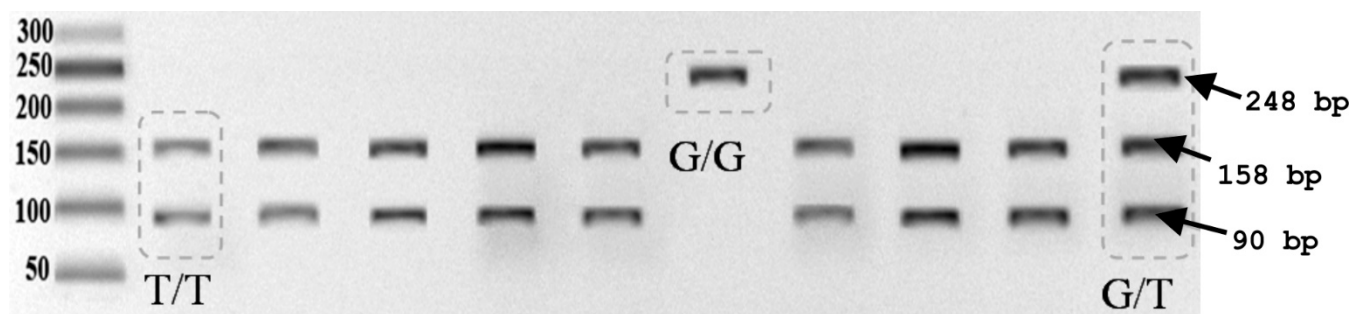

**Figure S3.** A fragment of the electrophoregram of the products of amplification of polymorphic alleles of the *NOS3* gene in martial artists: G/G, G/T, T/T – genotypes of the *NOS3* genes, numbers indicate the sample numbers, M – molecular marker (50 bp DNA Ladder), alleles are indicated by arrows.

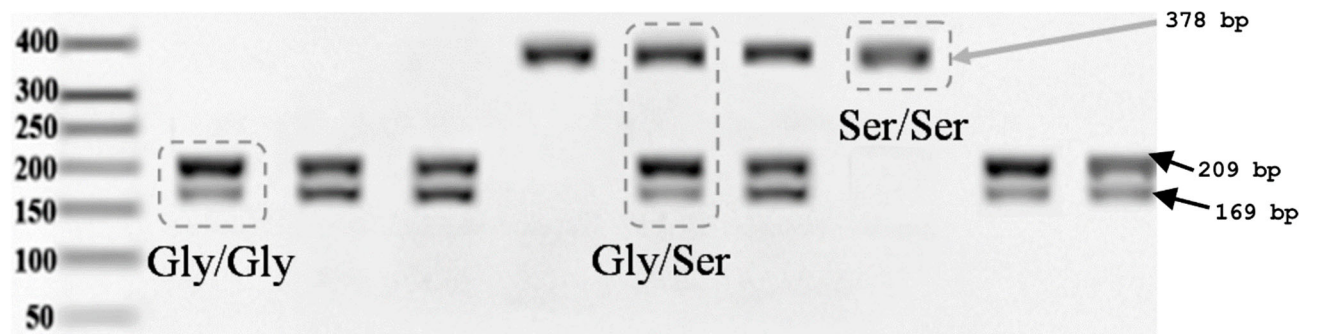

**Figure S4.** A fragment of the electrophoregram of the products of amplification of polymorphic alleles of the *PPARGC1A* gene in martial artists: Gly/Gly, Gly/Ser, Ser/Ser - *PPARGC1A* gene genotypes, numbers indicate sample numbers, M - molecular marker (50 bp DNA Ladder), alleles are indicated by arrows.

**Table S1.** The main characteristics of the combatants of Group I and Group II.

| <b>Characteristics</b>   | <b>Group I</b>                                                                                                          | <b>Group II</b>                                                                                  |
|--------------------------|-------------------------------------------------------------------------------------------------------------------------|--------------------------------------------------------------------------------------------------|
| Age                      | 10 - 16 years old<br>(Average age 13 years)                                                                             | 10 - 16 years old<br>(Average age 12 years)                                                      |
| Male gender              | 39 athletes                                                                                                             | 43 athletes                                                                                      |
| Female gender            | 11 athletes                                                                                                             | 7 athletes                                                                                       |
| Qualification            | 1 youth categories: 29 athletes<br>3 adult categories: 11 athletes<br>2 adult categories: 4 athletes<br>CMS: 6 athletes | 2 youth categories: 23 athletes<br>3 youth categories: 10 athletes<br>no categories: 17 athletes |
| Total number of athletes | 50                                                                                                                      | 50                                                                                               |

**Table S2.** Data on tested athletes.

| <b>№</b> | <b>Gender</b> | <b>Age</b> | <b>Qualification</b> | <b>Sports experience</b> | <b>Group</b> | <b><i>ACE</i></b> | <b><i>BDKRB2</i></b> | <b><i>PPARGC1A</i></b> | <b><i>NOS3</i></b> | <b>TGS “endurance”</b> |
|----------|---------------|------------|----------------------|--------------------------|--------------|-------------------|----------------------|------------------------|--------------------|------------------------|
| 1        | female        | 13         | 1 youth              | 5                        | I            | I/D               | +9/+9                | Gly/Gly                | T/T                | 37                     |
| 2        | male          | 12         | 1 youth              | 4                        | I            | I/D               | +9/+9                | Gly/Gly                | T/T                | 37                     |
| 3        | male          | 14         | 3 youth              | 4                        | II           | I/D               | -9/+9                | Gly/Gly                | T/T                | 50                     |
| 4        | male          | 11         | 3 youth              | 3                        | II           | I/D               | -9/+9                | Ser/Ser                | T/T                | 25                     |
| 5        | male          | 13         | 1 youth              | 5                        | I            | I/I               | -9/+9                | Gly/Gly                | T/T                | 62                     |
| 6        | male          | 12         | 1 youth              | 5                        | I            | I/D               | +9/+9                | Gly/Gly                | G/T                | 50                     |
| 7        | male          | 13         | 2 youth              | 3                        | II           | I/D               | +9/+9                | Gly/Gly                | T/T                | 37                     |
| 8        | male          | 13         | 1 youth              | 5                        | I            | D/D               | +9/+9                | Gly/Gly                | T/T                | 25                     |
| 9        | male          | 15         | -                    | 2                        | II           | I/D               | -9/+9                | Gly/Gly                | G/T                | 62                     |
| 10       | male          | 12         | 1 youth              | 5                        | I            | I/D               | +9/+9                | Gly/Gly                | T/T                | 37                     |
| 11       | male          | 15         | 3 adults             | 6                        | I            | I/D               | -9/+9                | Gly/Gly                | T/T                | 50                     |
| 12       | male          | 13         | 1 youth              | 4                        | I            | I/I               | +9/+9                | Gly/Gly                | G/T                | 62                     |
| 13       | male          | 11         | 1 youth              | 4                        | I            | I/D               | +9/+9                | Gly/Gly                | T/T                | 37                     |
| 14       | male          | 11         | 1 youth              | 4                        | I            | I/D               | +9/+9                | Gly/Gly                | T/T                | 37                     |
| 15       | female        | 13         | 1 youth              | 6                        | I            | I/D               | -9/+9                | Gly/Gly                | G/T                | 62                     |
| 16       | male          | 11         | 2 youth              | 2                        | II           | I/D               | +9/+9                | Gly/Gly                | T/T                | 37                     |
| 17       | female        | 11         | 1 youth              | 3                        | I            | I/D               | -9/+9                | Gly/Gly                | T/T                | 50                     |
| 18       | female        | 10         | 2 youth              | 3                        | II           | I/D               | +9/+9                | Gly/Gly                | G/T                | 50                     |
| 19       | male          | 12         | 1 youth              | 4                        | I            | I/D               | +9/+9                | Gly/Gly                | G/T                | 50                     |
| 20       | male          | 16         | 1 youth              | 5                        | I            | I/I               | -9/+9                | Gly/Gly                | G/T                | 75                     |
| 21       | male          | 13         | 1 youth              | 3                        | I            | I/D               | +9/+9                | Gly/Gly                | T/T                | 37                     |
| 22       | male          | 14         | 1 youth              | 4                        | I            | I/D               | +9/+9                | Gly/Gly                | T/T                | 37                     |
| 23       | female        | 11         | 1 youth              | 3                        | I            | I/D               | -9/+9                | Gly/Gly                | G/T                | 62                     |
| 24       | male          | 13         | 2 youth              | 2                        | II           | I/D               | +9/+9                | Gly/Gly                | T/T                | 37                     |
| 25       | male          | 11         | 2 youth              | 3                        | II           | I/I               | -9/+9                | Gly/Ser                | T/T                | 50                     |
| 26       | male          | 10         | 2 youth              | 2                        | II           | I/D               | -9/+9                | Gly/Gly                | T/T                | 50                     |
| 27       | female        | 10         | 1 youth              | 3                        | I            | I/I               | +9/+9                | Gly/Gly                | T/T                | 50                     |
| 28       | male          | 16         | CMS                  | 9                        | I            | I/D               | +9/+9                | Gly/Gly                | T/T                | 37                     |

|    |        |    |          |   |    |     |       |         |     |    |
|----|--------|----|----------|---|----|-----|-------|---------|-----|----|
| 29 | female | 14 | 2 adults | 7 | I  | I/D | +9/+9 | Gly/Gly | T/T | 37 |
| 30 | male   | 14 | 2 adults | 6 | I  | D/D | +9/+9 | Gly/Gly | G/T | 37 |
| 31 | male   | 14 | 2 adults | 7 | I  | I/D | +9/+9 | Gly/Gly | G/G | 62 |
| 32 | male   | 16 | 3 adults | 6 | I  | I/D | -9/+9 | Gly/Ser | G/G | 62 |
| 33 | male   | 15 | 3 adults | 5 | I  | I/D | +9/+9 | Gly/Ser | G/G | 50 |
| 34 | male   | 16 | 3 adults | 7 | I  | I/D | -9/+9 | Gly/Ser | T/T | 37 |
| 35 | male   | 16 | 3 adults | 6 | I  | I/D | +9/+9 | Gly/Ser | T/T | 25 |
| 36 | male   | 14 | 2 youth  | 5 | II | D/D | -9/+9 | Gly/Ser | T/T | 25 |
| 37 | male   | 14 | 2 youth  | 6 | II | D/D | +9/+9 | Gly/Ser | G/T | 25 |
| 38 | male   | 13 | 2 youth  | 5 | II | D/D | +9/+9 | Gly/Ser | T/T | 12 |
| 39 | male   | 10 | 2 youth  | 3 | II | D/D | +9/+9 | Gly/Ser | T/T | 12 |
| 40 | female | 12 | 2 youth  | 5 | II | D/D | +9/+9 | Gly/Ser | T/T | 12 |
| 41 | female | 12 | 2 youth  | 4 | II | D/D | +9/+9 | Gly/Ser | T/T | 12 |
| 42 | female | 13 | 1 youth  | 5 | I  | D/D | -9/+9 | Gly/Ser | G/T | 37 |
| 43 | male   | 12 | 1 youth  | 4 | I  | D/D | -9/+9 | Gly/Gly | T/T | 37 |
| 44 | male   | 13 | 1 youth  | 4 | I  | D/D | +9/+9 | Gly/Gly | G/T | 37 |
| 45 | male   | 12 | 1 youth  | 4 | I  | D/D | +9/+9 | Gly/Gly | T/T | 25 |
| 46 | male   | 13 | 1 youth  | 5 | I  | D/D | -9/+9 | Gly/Gly | G/T | 50 |
| 47 | male   | 12 | 1 youth  | 4 | I  | D/D | -9/+9 | Gly/Ser | G/T | 37 |
| 48 | male   | 13 | 1 youth  | 5 | I  | D/D | -9/+9 | Gly/Gly | T/T | 37 |
| 49 | male   | 11 | 1 youth  | 3 | I  | D/D | +9/+9 | Gly/Gly | G/T | 37 |
| 50 | male   | 11 | 1 youth  | 4 | I  | D/D | -9/+9 | Gly/Gly | T/T | 37 |
| 51 | male   | 15 | -        | 2 | II | D/D | -9/+9 | Gly/Ser | T/T | 25 |
| 52 | male   | 12 | -        | 1 | II | D/D | -9/+9 | Gly/Ser | T/T | 25 |
| 53 | male   | 12 | -        | 2 | II | D/D | -9/+9 | Gly/Ser | T/T | 25 |
| 54 | male   | 11 | 3 youth  | 1 | II | D/D | -9/+9 | Gly/Ser | G/T | 37 |
| 55 | male   | 11 | 1 youth  | 3 | I  | D/D | -9/+9 | Gly/Gly | T/T | 37 |
| 56 | male   | 13 | -        | 1 | II | D/D | +9/+9 | Gly/Ser | T/T | 12 |
| 57 | male   | 14 | -        | 2 | II | D/D | +9/+9 | Gly/Ser | G/T | 25 |
| 58 | male   | 13 | -        | 2 | II | D/D | -9/+9 | Gly/Ser | T/T | 25 |
| 59 | male   | 13 | -        | 1 | II | I/D | +9/+9 | Gly/Ser | T/T | 25 |
| 60 | female | 13 | 1 youth  | 5 | I  | D/D | -9/+9 | Gly/Ser | G/T | 37 |



|    |        |    |          |   |    |     |       |         |     |    |
|----|--------|----|----------|---|----|-----|-------|---------|-----|----|
| 61 | male   | 12 | -        | 2 | II | D/D | +9/+9 | Gly/Gly | G/T | 37 |
| 62 | male   | 12 | -        | 2 | II | I/D | +9/+9 | Gly/Ser | T/T | 25 |
| 63 | male   | 15 | -        | 2 | II | D/D | -9/+9 | Gly/Gly | G/T | 50 |
| 64 | male   | 12 | -        | 1 | II | D/D | +9/+9 | Gly/Gly | T/T | 25 |
| 65 | male   | 14 | -        | 2 | II | I/D | +9/+9 | Gly/Gly | T/T | 37 |
| 66 | female | 14 | 2 youth  | 5 | II | I/D | +9/+9 | Gly/Gly | T/T | 37 |
| 67 | male   | 15 | -        | 2 | II | D/D | +9/+9 | Gly/Gly | G/T | 37 |
| 68 | male   | 16 | -        | 2 | II | I/D | +9/+9 | Gly/Gly | T/T | 37 |
| 69 | male   | 11 | 3 youth  | 3 | II | I/D | +9/+9 | Gly/Gly | G/T | 50 |
| 70 | male   | 13 | -        | 2 | II | D/D | +9/+9 | Gly/Gly | T/T | 25 |
| 71 | female | 11 | 1 youth  | 4 | I  | D/D | -9/+9 | Gly/Gly | G/T | 50 |
| 72 | male   | 10 | 3 youth  | 2 | II | D/D | +9/+9 | Gly/Ser | T/T | 12 |
| 73 | male   | 10 | -        | 1 | II | D/D | +9/+9 | Gly/Gly | T/T | 25 |
| 74 | female | 11 | 3 youth  | 3 | II | D/D | -9/+9 | Gly/Gly | T/T | 37 |
| 75 | male   | 10 | 2 youth  | 2 | II | D/D | +9/+9 | Gly/Gly | T/T | 25 |
| 76 | male   | 10 | 3 youth  | 3 | II | D/D | +9/+9 | Gly/Gly | T/T | 25 |
| 77 | male   | 16 | CMS      | 9 | I  | I/D | -9/+9 | Gly/Gly | G/T | 62 |
| 78 | male   | 10 | 2 youth  | 2 | II | I/I | +9/+9 | Gly/Gly | G/T | 62 |
| 79 | male   | 10 | 2 youth  | 3 | II | I/D | +9/+9 | Gly/Gly | T/T | 37 |
| 80 | male   | 10 | 2 youth  | 2 | II | I/I | +9/+9 | Gly/Gly | T/T | 50 |
| 81 | male   | 16 | 3 adults | 6 | I  | I/I | +9/+9 | Gly/Gly | T/T | 50 |
| 82 | male   | 10 | 2 youth  | 2 | II | I/I | +9/+9 | Gly/Gly | T/T | 50 |
| 83 | female | 16 | CMS      | 8 | I  | I/D | +9/+9 | Ser/Ser | T/T | 12 |
| 84 | female | 16 | CMS      | 9 | I  | I/D | -9/+9 | Gly/Gly | G/G | 75 |
| 85 | male   | 16 | CMS      | 9 | I  | I/D | -9/+9 | Gly/Gly | T/T | 50 |
| 86 | male   | 16 | CMS      | 9 | I  | D/D | -9/+9 | Ser/Ser | G/G | 37 |
| 87 | male   | 12 | 2 youth  | 3 | II | I/D | +9/+9 | Gly/Gly | T/T | 37 |
| 88 | male   | 13 | 2 youth  | 4 | II | D/D | -9/+9 | Gly/Gly | G/T | 50 |
| 89 | male   | 16 | 3 adults | 6 | I  | D/D | -9/+9 | Ser/Ser | G/G | 37 |
| 90 | male   | 15 | 3 adults | 6 | I  | I/I | -9/+9 | Gly/Gly | T/T | 62 |
| 91 | male   | 14 | 2 adults | 6 | I  | I/D | -9/+9 | Gly/Gly | T/T | 50 |
| 92 | male   | 15 | 3 adults | 5 | I  | I/I | +9/+9 | Gly/Gly | T/T | 50 |

|     |        |    |          |   |    |     |       |         |     |    |
|-----|--------|----|----------|---|----|-----|-------|---------|-----|----|
| 93  | male   | 16 | 3 adults | 7 | I  | D/D | +9/+9 | Gly/Gly | T/T | 25 |
| 94  | female | 12 | 2 youth  | 3 | II | I/D | -9/+9 | Gly/Gly | T/T | 50 |
| 95  | male   | 15 | 3 adults | 7 | I  | I/I | -9/+9 | Gly/Gly | T/T | 62 |
| 96  | male   | 10 | 3 youth  | 2 | II | D/D | -9/+9 | Gly/Ser | G/T | 37 |
| 97  | male   | 11 | 2 youth  | 3 | II | D/D | -9/+9 | Gly/Gly | T/T | 37 |
| 98  | male   | 11 | 3 youth  | 2 | II | I/D | +9/+9 | Ser/Ser | G/T | 25 |
| 99  | female | 13 | 3 youth  | 4 | II | D/D | -9/+9 | Ser/Ser | T/T | 12 |
| 100 | male   | 16 | 2 youth  | 6 | II | D/D | +9/+9 | Gly/Gly | T/T | 25 |
